# Supplementary material
Source: PubMed Central journal article supplement (PMC7893547)
Supplement: jamaophthalmol-e207053-s001.pdf [file jamaophthalmol-e207053-s001.pdf]

## Supplementary Online Content

Sabharwal S, Nakayoshi A, Lees CR, Perez S, de Alba Campomanes AG. Prevalence and factors associated with eyeglass wear compliance among preschoolers from low-income families in San Francisco, California. *JAMA Ophthalmol*. Published online February 18, 2021. doi:10.1001/jamaophthalmol.2020.7053

**eFigure 1.** Weekly Eyeglass Compliance Observation Reports Completed by Teachers

**eFigure 2.** Tracking Weekly Compliance Scores of Compliant Students (Yearlong Average Compliance Score  $\geq 4$ )

This supplementary material has been provided by the authors to give readers additional information about their work.

**eFigure 1. Weekly Eyeglass Compliance Observation Reports Completed by Teachers**

| Agency:   |            |                                                                                              |                                 |                                 |                                 |                                 |       |                |
|-----------|------------|----------------------------------------------------------------------------------------------|---------------------------------|---------------------------------|---------------------------------|---------------------------------|-------|----------------|
| School:   |            | For each child, check the box that most accurately describes their glasses wear for the week |                                 |                                 |                                 |                                 |       |                |
| Week of:  |            |                                                                                              |                                 |                                 |                                 |                                 |       |                |
| Last Name | First Name | Every day/All day                                                                            | Every day more than 50% of time | Every day Less than 50% of time | Inconsistent: 2-3 days per week | Rarely: 1 or less days per week | Never | No information |
| Doe       | John       | X                                                                                            |                                 |                                 |                                 |                                 |       |                |
| Doe       | Jane       |                                                                                              |                                 | X                               |                                 |                                 |       |                |
|           |            |                                                                                              |                                 |                                 |                                 |                                 |       |                |
|           |            |                                                                                              |                                 |                                 |                                 |                                 |       |                |
|           |            |                                                                                              |                                 |                                 |                                 |                                 |       |                |
|           |            |                                                                                              |                                 |                                 |                                 |                                 |       |                |
|           |            |                                                                                              |                                 |                                 |                                 |                                 |       |                |
|           |            |                                                                                              |                                 |                                 |                                 |                                 |       |                |
|           |            |                                                                                              |                                 |                                 |                                 |                                 |       |                |
|           |            |                                                                                              |                                 |                                 |                                 |                                 |       |                |

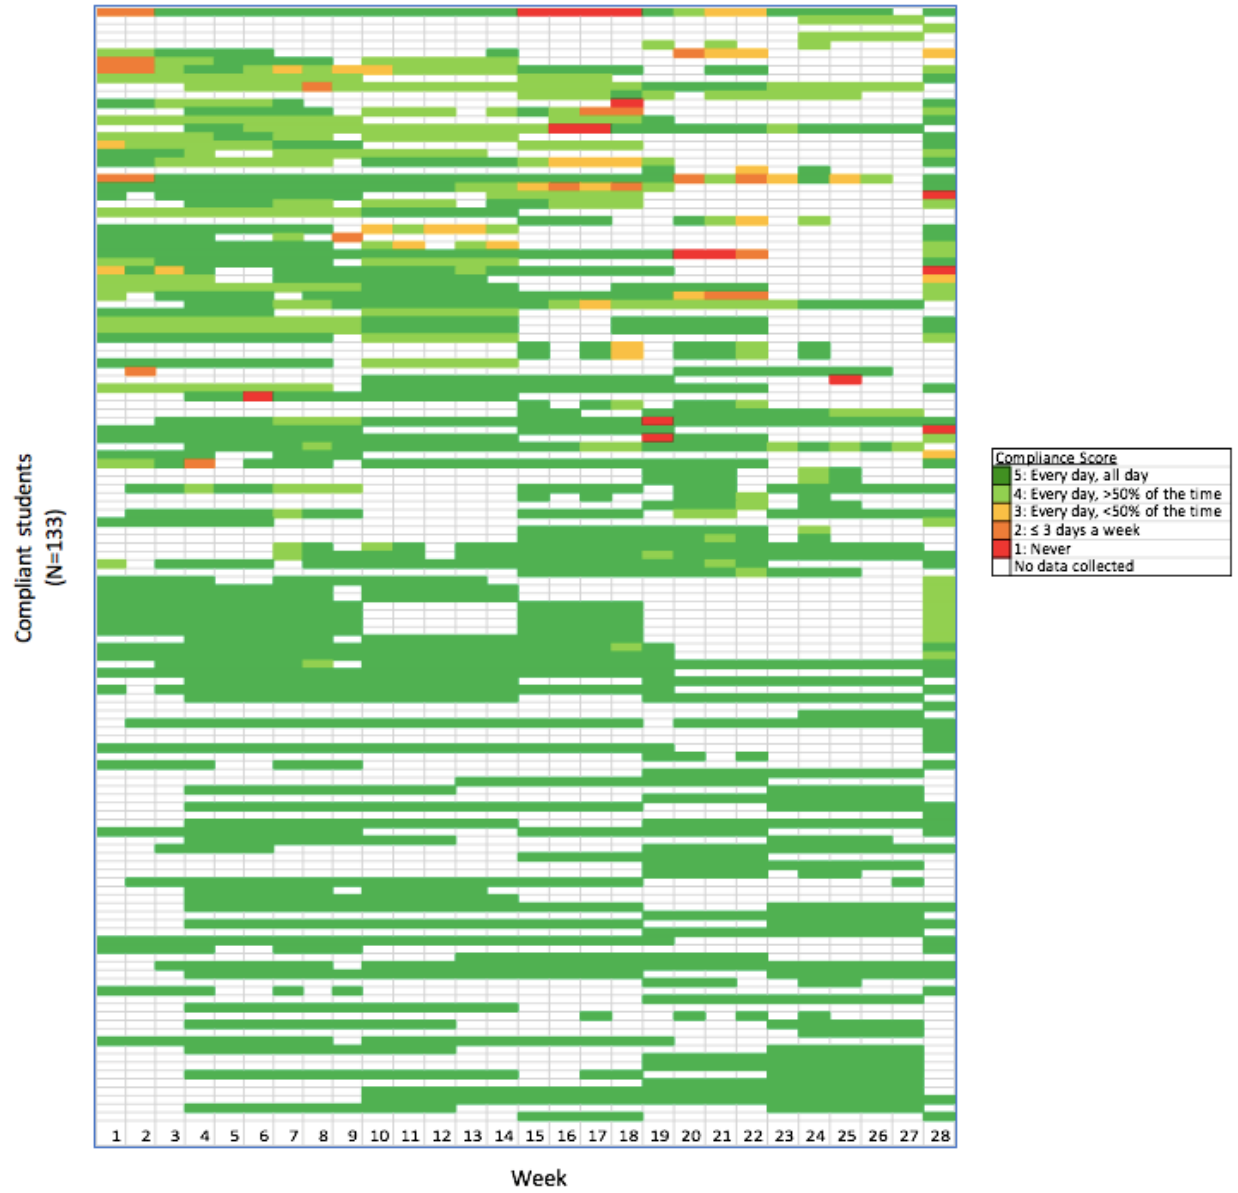

**eFigure 2.** Tracking Weekly Compliance Scores of Compliant Students (Yearlong Average Compliance Score  $\geq 4$ )
